# Supplementary material for: Antirepressor specificity is shaped by highly efficient dimerization of the staphylococcal pathogenicity island regulating repressors: Stl repressor dimerization perturbed by dUTPases
Source: PubMed Central journal article supplement (PMC10806181; doi:10.1038/s41598-024-51260-y), 2024-01-23

## SUPPORTING INFORMATION

### **Antirepressor specificity is shaped by highly efficient dimerization of the staphylococcal pathogenicity island regulating repressors: StI repressor dimerization perturbed by dUTPases**

**Kinga Nyíri<sup>1,2,\*</sup>, Enikő Gál<sup>1,2</sup>, Máté Laczkovich<sup>1,2</sup>, Beáta G. Vértessy<sup>1,2</sup>**

<sup>1</sup> Department of Applied Biotechnology and Food Science, Faculty of Chemical Technology and Biotechnology, Budapest University of Technology and Economics, Műegyetem rkp. 3., H-1111 Budapest, Hungary

<sup>2</sup> Institute of Enzymology, Research Centre for Natural Sciences, Hungarian Academy of Sciences, Budapest, Magyar tudósok krt 2. H-1117, Hungary

\* To whom correspondence should be addressed. Email: [nyiri.kinga@vbk.bme.hu](mailto:nyiri.kinga@vbk.bme.hu)

#### **Supplementary Methods**

##### **Chemical crosslinking**

1% PFA was added to solution of Sa-StI and Sho-StI of 1.5  $\mu$ M concentration. The samples were subjected to SDS gelelectrophoresis (200 V, 45 min) after 30 minutes of incubation at room temperature. Resulting gel was stained with Page Blue protein staining solution.

##### **Size exclusion chromatography**

Proteins were subjected to gelfiltration onto a GE Healthcare S200 Increase 10/300 (24 ml) column in a buffer consisting of 50 mM HEPES, pH = 7.5, 300 mM NaCl.

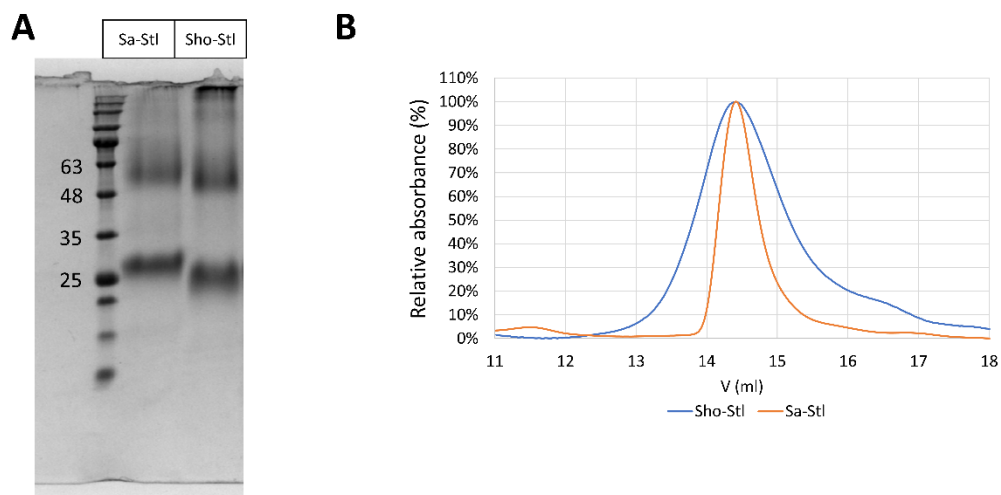

**Figure S1. Chemical crosslinking (A) and gel filtration (B) of Sho-Stl. Both experimental results indicate that the Sho-Stl protein forms dimers as Sa-Stl**

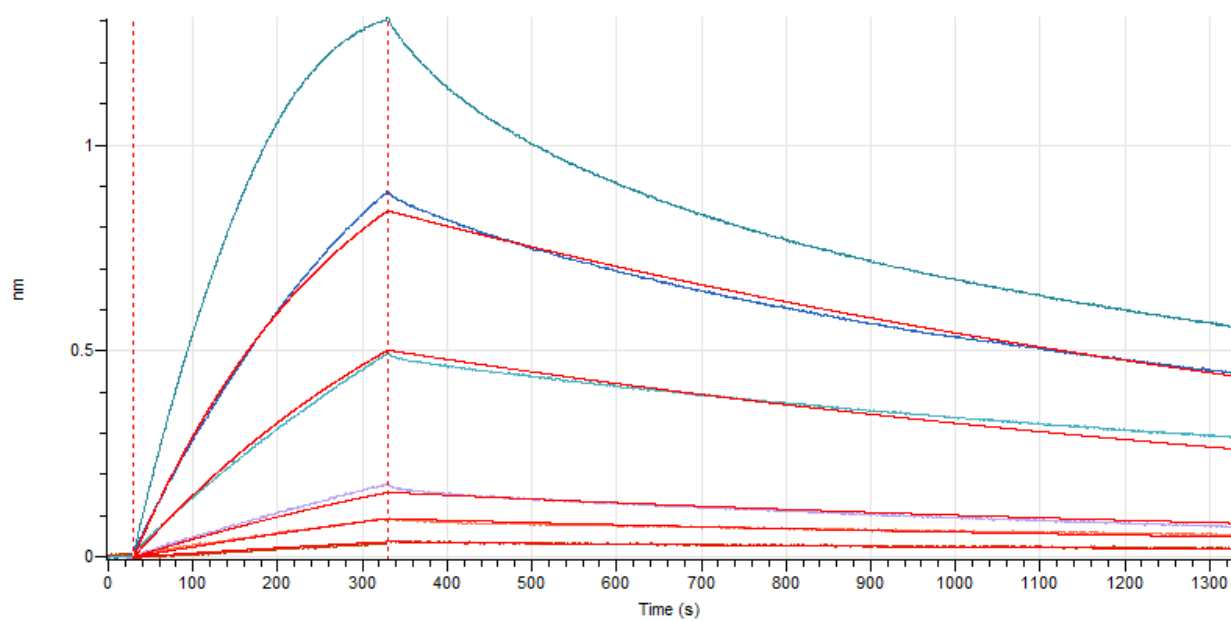

**Figure S2. BLI curves of Avi-tagged human dUTPase and Sa-Stl**

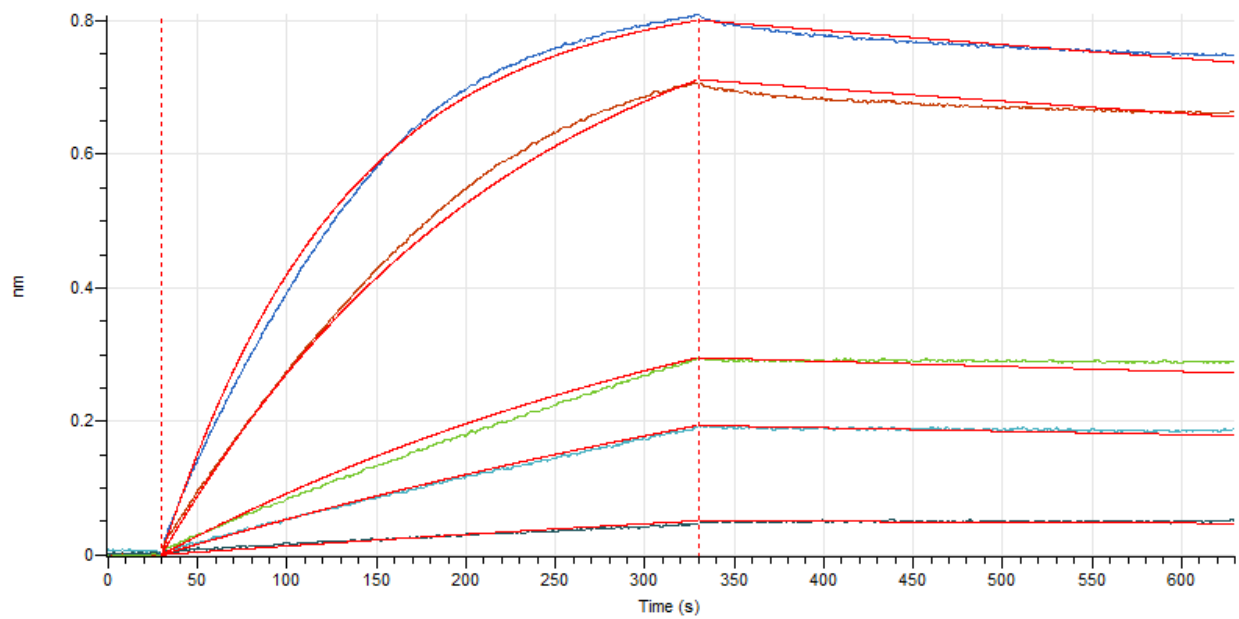

**Figure S3. BLI curves of Avi-tagged Sa-Stl and human dUTPase**

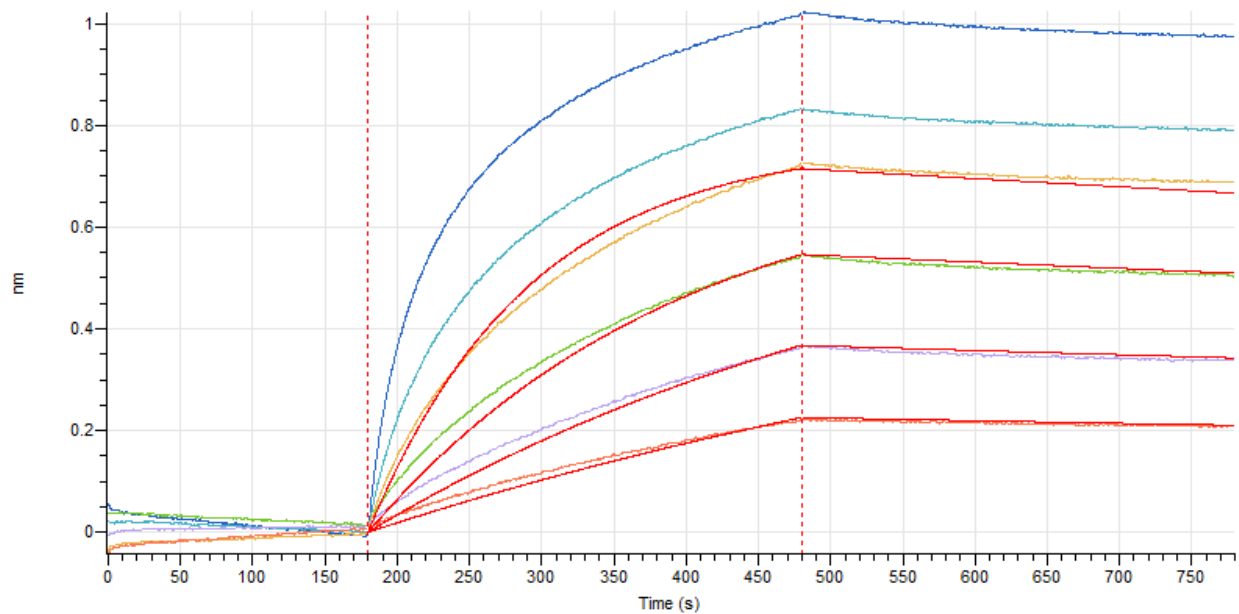

**Figure S4. BLI curves of Avi-tagged Sho-Stl and human dUTPase**

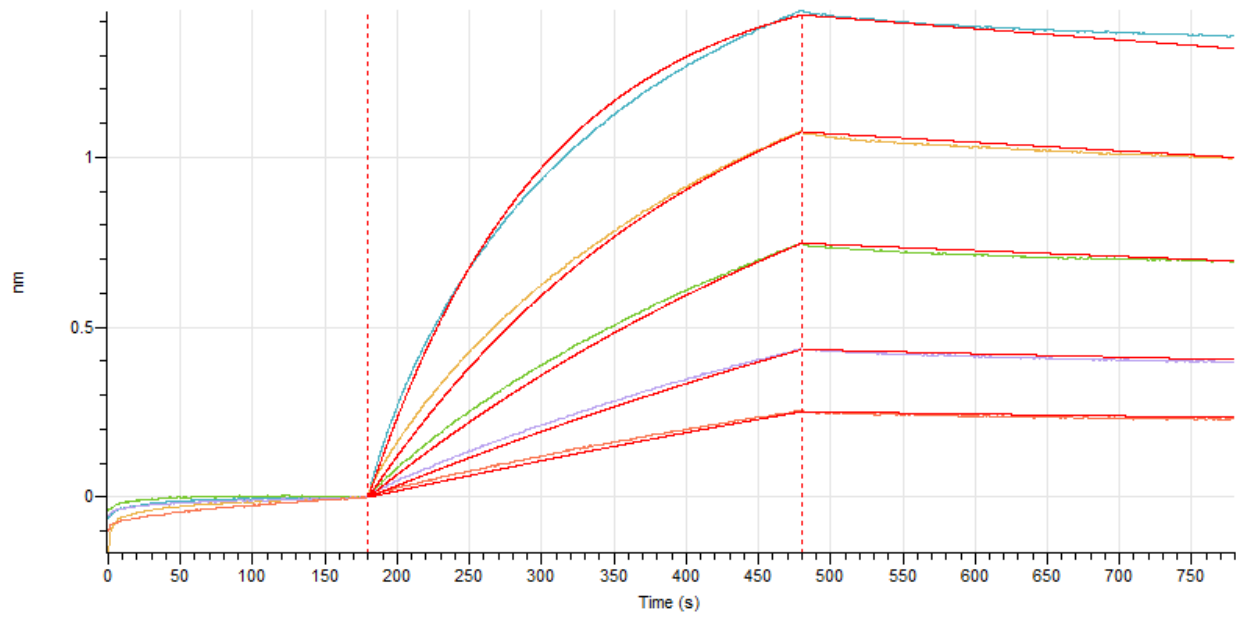

**Figure S5. BLI curves of Avi-tagged Sho-Stl-NDY and human dUTPase**

hDUT + Sho-Stl (strongly distorted binding curves)

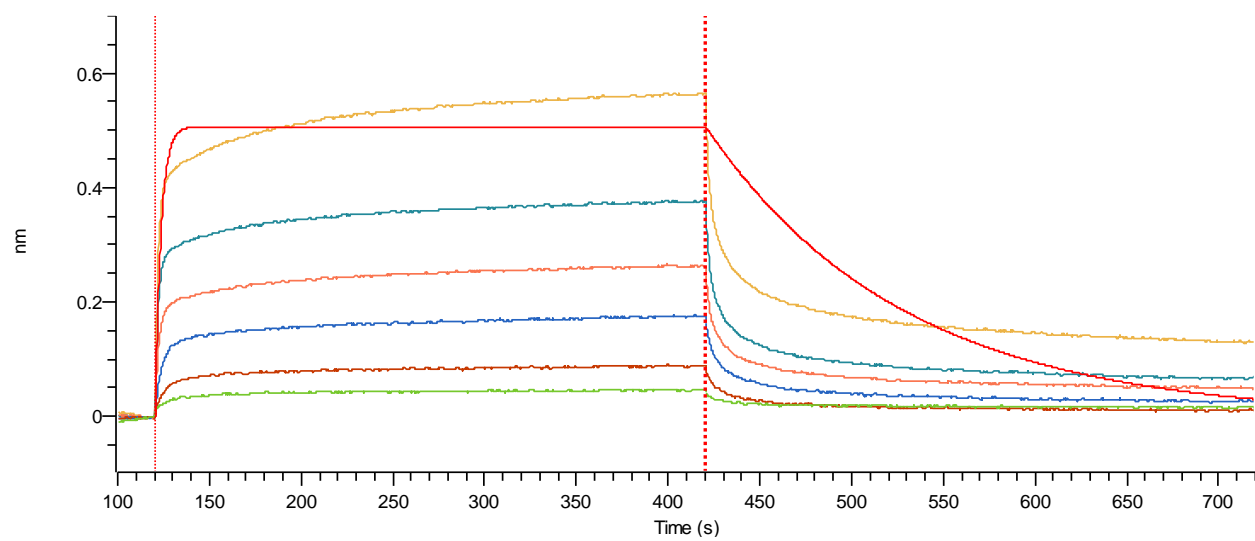

**Figure S6. BLI curves of Avi-tagged human dUTPase and Sho-Stl Strongly distorted association curves, with a shape resembling for mass transport limitation in the system, the dissociation fast as that is facilitated by the dimer formation.**

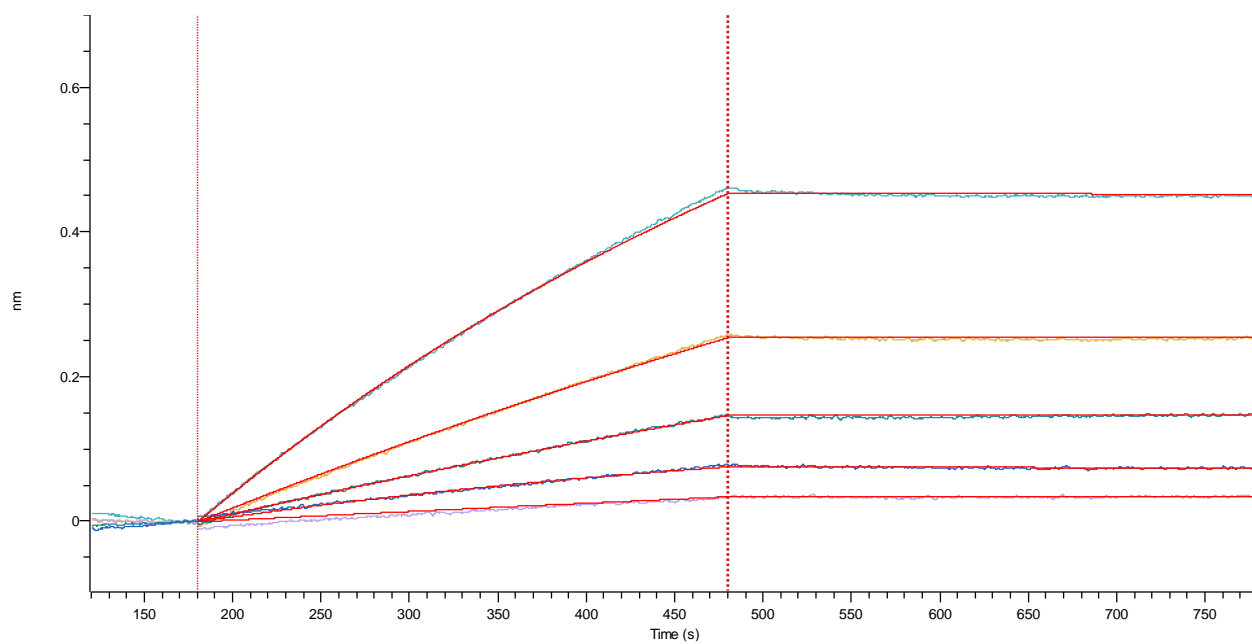

**Figure S7. BLI curves of Avi-tagged Sho-Stl and mycobacterial dUTPase**

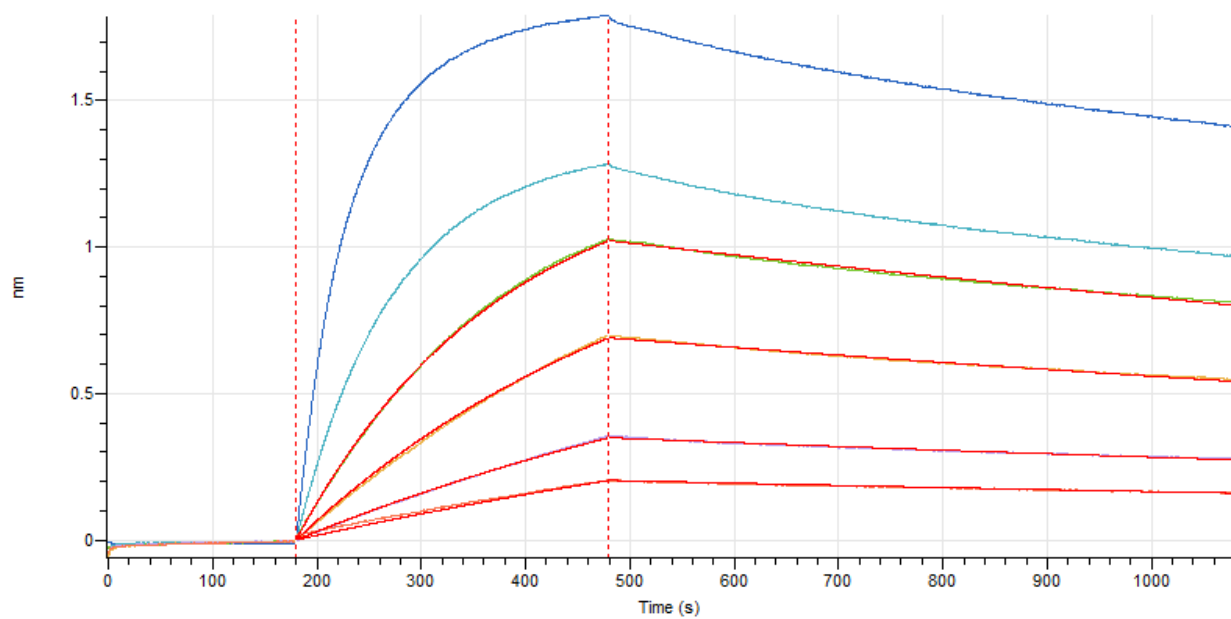

**Figure S8. BLI curves of Avi-tagged mycobacterial dUTPase and Sho-Stl**

**Table S1. List of mutagenesis and cloning primers**

| Name             | sequence (5'→3')                                                       |
|------------------|------------------------------------------------------------------------|
| hDUT-avi-F       | <u>TATTCTCGAGTATGGGCAGCAGCC</u>                                        |
| hDUT-avi-R       | <u>GTCCGGTACCTTAATTCTTTCCAGTGGAAC</u>                                  |
| SaStl-avi-F      | GGCTCAGAAAATCGAATGGCACGAATAACTCGAGCGGCCGCAT                            |
| SaStl-avi-R      | TCGAAGATGTCGTT CAGGCCGGACATGTTGGTATCTTTTTCCAGAATAATTT<br>TTTTCTGATGTTT |
| ShoStl-avi-F     | TCAGAAAATCGAATGGCACGAATAAGCGGCCGCATCGTGA                               |
| ShoStl-avi-R     | GCCTCGAAGATGTCGTT CAGGCCCTTGCTGTTTTTAATCTGTTCAATGAATT<br>CATCC         |
| Sho-Stl-ND-F*    | TTATCCACGAAGTTATAGATAC                                                 |
| Sho-Stl-ND-R     | AGCCTATTATAACGATGGTGATATCTACTTC                                        |
| Sho-Stl-Y-F*     | TGATATCTACTACAGCAGCTATG                                                |
| Sho-Stl-Y-R      | CCATCGTTATAATAGGCTTTATC                                                |
| ShoStl-NDY-avi-F | TCAGAAAATCGAATGGCACGAATAAGCGGCCGCATCGTGA                               |
| ShoStl-NDY-avi-R | GCCTCGAAGATGTCGTT CAGGCCCTTGCTGTTTTTAATCTGTTCAATGAATT<br>CATCC         |
| mtDUT-avi-F      | TATGCTCGAGTATGGGCAGCAGCCATCATC                                         |
| mtDUT-avi-R      | GCAGGTACCTCACAAACTCGCATGTCCG                                           |

\* Sho-Stl-ND-F/R and Sho-Stl-Y-F/R primers were applied in 2 subsequent rounds of mutagenesis to result in the triple mutant Sho-Stl-NDY

**SDS PAGE images of the final protein preparations used in this study**

Sa-Stl

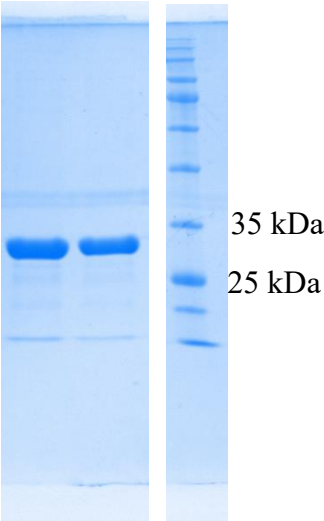

Sa-Stl-avi

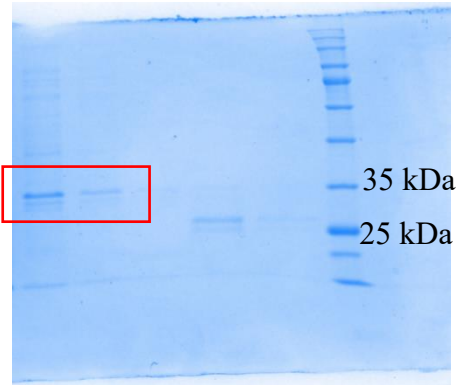

Sho-Stl

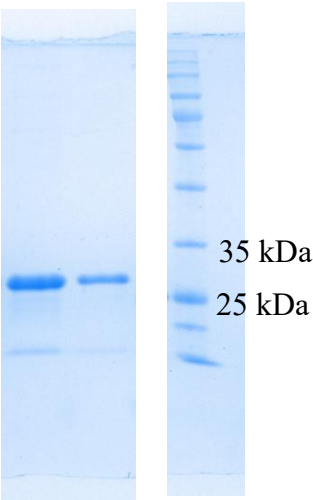

Sho-Stl-avi

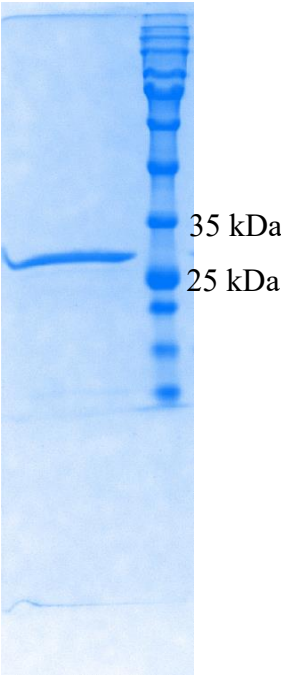



Sho-Stl-NDY

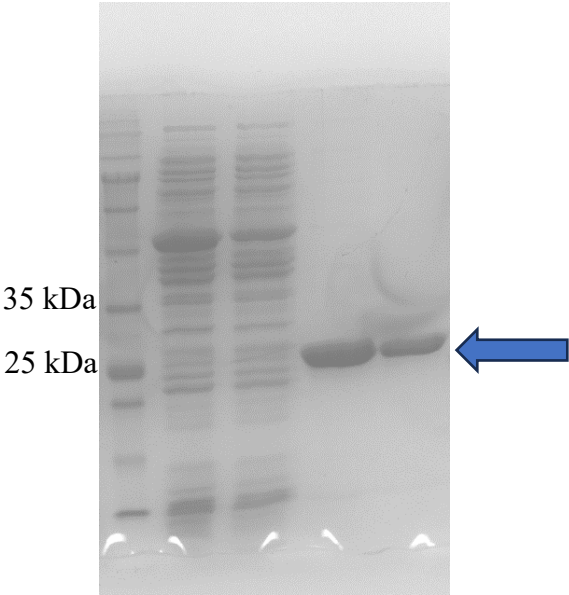

Sho-Stl-NDY-avi

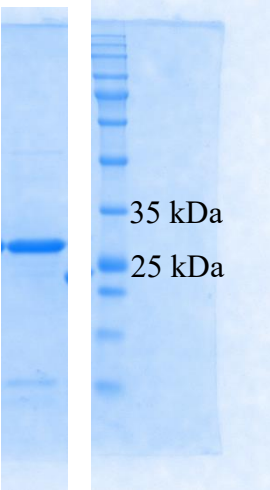

hDUT

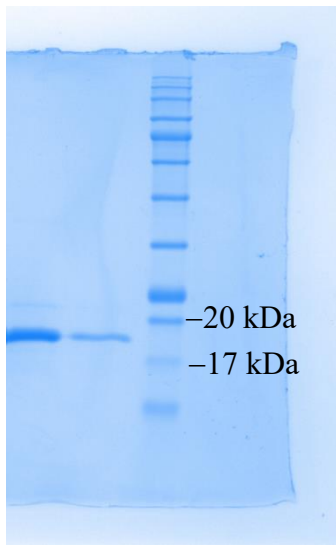

hDUT-avi

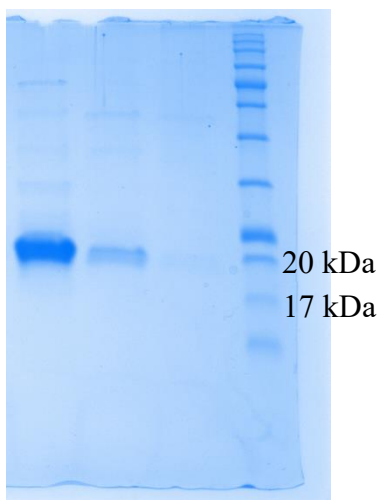

MtDUT-avi

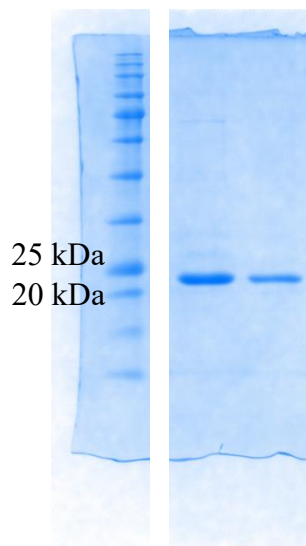

MtDUT

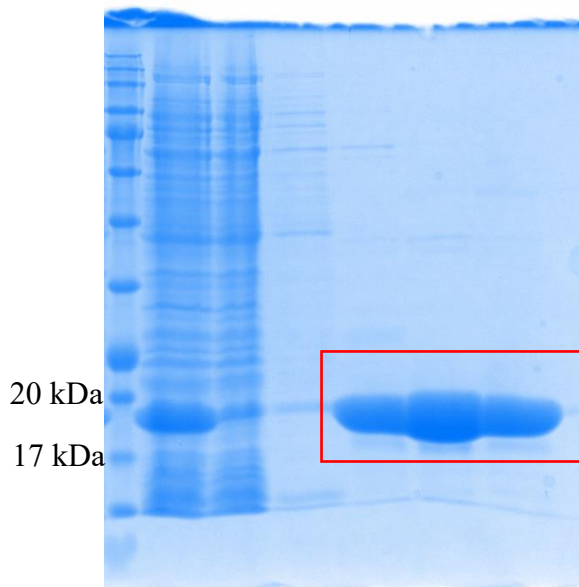

Supplement: 41598_2024_51260_MOESM1_ESM.pdf [file 41598_2024_51260_MOESM1_ESM.pdf]
